# Supplementary material for: Synthesis of stable zinc-phosphate micro/nanoparticles under acid and alkaline conditions
Source: Research Square preprint supplement (doi:10.21203/rs.3.rs-6908597/v1), 2025-06-30
Supplement: Supplementary file 1 [file db2504dddbfcb26bb8410459.docx]

**Supplementary Information**

**Synthesis of stable zinc-phosphate micro/nanoparticles under acid and alkaline conditions**

**Journal of Nanoparticle Research**

**Benjamín Valdez-Salas1***†**, Karen Guillén-Carvajal1***†**, Ernesto Beltrán-Partida1, Jorge Salvador-Carlos1, Mario Alberto Curiel-Álvarez2, Nicola Nedev2**

*Correspondence: [benval@uabc.edu.mx](mailto:benval@uabc.edu.mx), [kguillen@uabc.edu.mx](mailto:kguillen@uabc.edu.mx)

†These authors contributed equally to this work.

1Core Facility- Química y materiales avanzados, Instituto de Ingeniería, Universidad Autónoma de Baja California, Blvd. Benito Juárez and Normal s/n., 21280 Mexicali, Baja California, México

2Core Facility- Semiconductores y manufactura avanzada, Instituto de Ingeniería, Universidad Autónoma de Baja California, Blvd. Benito Juárez and Normal s/n., 21280 Mexicali, Baja California, México

**Table S1** Composition of chemical synthesis tests for ZnP in both acidic and alkaline media using droplets as a measure. A= acid, B= alkaline, HCl= hydrochloric acid, citric acid= AC, ascorbic acid= AA, and CC= Cocobetaine

| **Medium** | **Name** | **N** |  | **AC** | **AA** | **CC** |
| --- | --- | --- | --- | --- | --- | --- |
|  | *Preliminar* | | | | | |
| B | ZnPB | 13 | - | - | - | 1% |
| A | ZnPA | - | 2 | - | - | 1% |
|  | *Trial* | | | | | |
| B | 1BHCl | 13 / - | - | - | - | 1% |
| B | 2BHCl | 13 / 15 | - | - | - | 0.5% |
| B | 3BHCl | 15 / - | - | - | - | 0.1% |
| B | 1BAC | 20 / 19 | - | - | - | 1% |
| B | 2BAC | 13 / - | - | - | - | 0.5% |
| B | 3BAC | 14 / 14 | - | - | - | 0.1% |
| B | 1BAA | 10 / - | - | - | - | 1% |
| B | 2BAA | 12 / - | - | - | - | 0.5% |
| B | 3BAA | 10 / - | - | - | - | 0.1% |
| A | 1HCl | - | 3 / 4 | - | - | 1% |
| A | 2HCl | - | 3 / - | - | - | 0.5% |
| A | 3HCl | - | 2 / - | - | - | 0.1% |
| A | 1AC | - | - | 14 / - | - | 1% |
| A | 2AC | - | - | 18 / - | - | 0.5% |
| A | 3AC | - | - | 10 / 14 | - | 0.1% |
| A | 1AA | - | - | - | 40 / - | 1% |
| A | 2AA | - | - | - | 30 / - | 0.5% |
| A | 3AA | - | - | - | 20 / - | 0.1% |

**Table S2** Preliminary resuspension tests in ZnP in a chemical medium. HCl = hydrochloric acid, citric acid = AC, ascorbic acid = AA, and CC = Cocobetaine

| **Name** |  | **AC** | **AA** | **CC** | **Alkaline medium** |
| --- | --- | --- | --- | --- | --- |
| 1BHCl | YES | X | X | X | X |
| 2BHCl | YES | X | X | X | X |
| 3BHCl | YES | X | X | X | X |
| 1BAC | YES | YES | X | X | X |
| 2BAC | YES | YES | YES | X | X |
| 3BAC | YES | YES | X | X | X |
| 1BAA | YES | YES | YES | X | X |
| 2BAA | YES | YES | YES | X | X |
| 3BAA | YES | YES | YES | X | X |

**Table S3** Yield and quantity of each acid used for the resuspension of 10 mL of ZnP synthesis solution in a basic medium. The quantity is in drops. A= acid, B= alkaline, HCl= hydrochloric acid, citric acid= AC, ascorbic acid= AA, and CC= Cocobetaine

| **Name** |  | **AC** | **AA** | **CC** | **Yield (%)** |
| --- | --- | --- | --- | --- | --- |
| 1BHCl | 15 | - | - | 1% | 53.9083 |
| 2BHCl | 20 | - | - | 0.5% | 57.6405 |
| 3BHCl | 20 | - | - | 0.1% | 78.3744 |
| 1BAC | 25 | 12 | - | 1% | 66.7634 |
| 2BAC | 20 | - | - | 0.5% | 52.2496 |
| 3BAC | 8 | - | - | 0.1% | 62.2019 |
| 1BAA | - | - | 60 | 1% | 50.1762 |
| 2BAA | - | - | 60 | 0.5% | 41.0533 |
| 3BAA | - | - | 40 | 0.1% | 2.9028 |

**Table S4** DLS response for the presence of MCPs and NPs upon resuspension. + Positive result, - Negative result. HCl = hydrochloric acid, citric acid = AC, ascorbic acid = AA, and CC = Cocobetaine

| *C* | **Acid medium** | | | **Alkaline medium** | | |
| --- | --- | --- | --- | --- | --- | --- |
| *CC* | *1%* | *0.5%* | *0.1%* | *1%* | *0.5%* | *0.1%* |
| *AC* | *-* | *-* | ***+*** | ***+*** | *-* | ***+*** |
| *HCl* | ***+*** | *-* | *-* | *-* | ***+*** | *-* |
| *AA* | ***+*** | ***+*** | *-* | ***+*** | *-* | *-* |


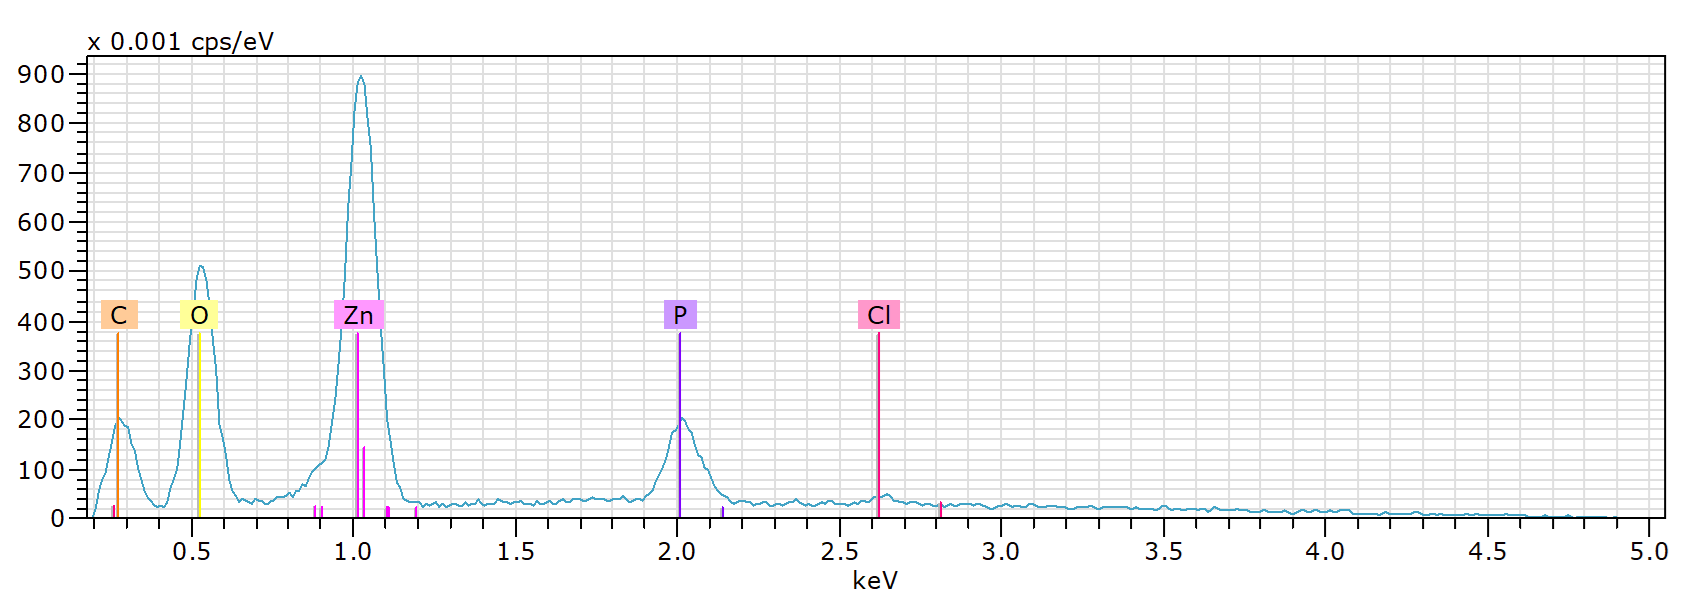


**Fig. S1** Analysis of the chemical composition by EDS of ZnP in alkaline medium


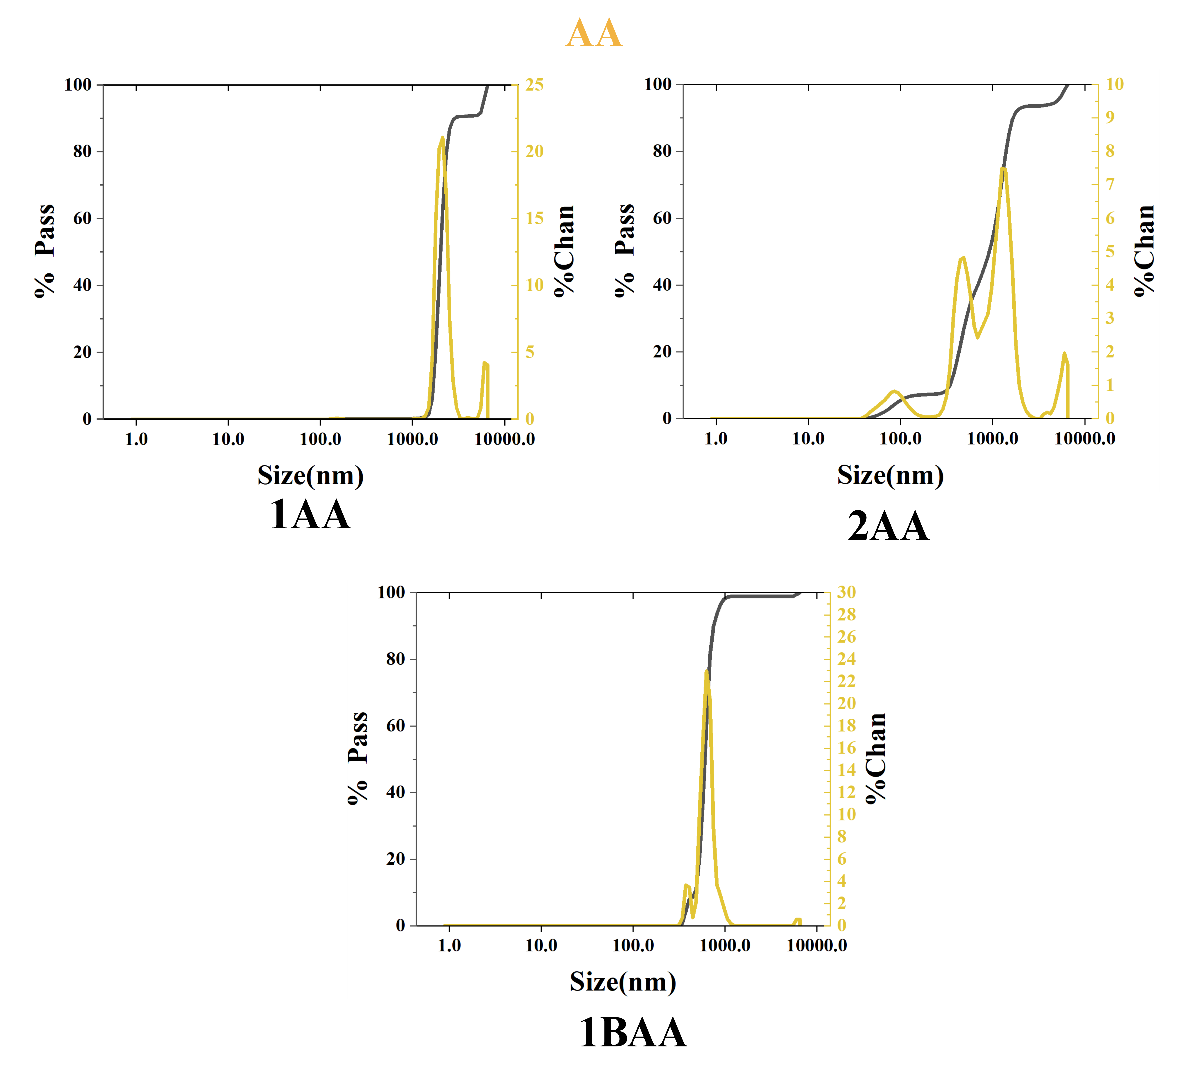


**Fig. S2** Size distribution of MCPs obtained in acidic and alkaline media using ascorbic acid (AA). 1AA corresponds to 1% cocobetaine (CC), 2AA corresponds to 0.5% CC, and 1BAA is in alkaline media using 1% CC
